# Supplementary material for: Local Evolution of Seed Flotation in Arabidopsis
Source: PubMed Central journal article supplement (PMC3953066; doi:10.1371/journal.pgen.1004221), 2014-03-13

Figure S3

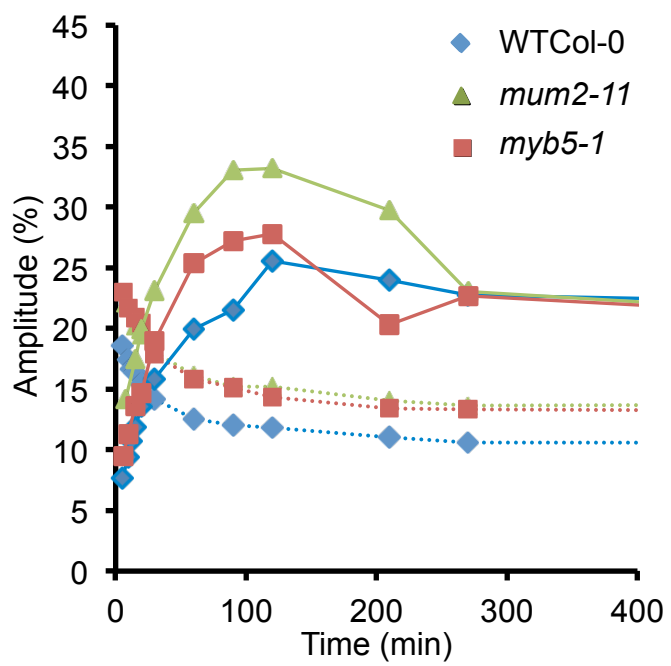

Supplement: pgen.1004221.s003.pdf [file pgen.1004221.s003.pdf]
