# Supplementary material for: Local Evolution of Seed Flotation in Arabidopsis
Source: PubMed Central journal article supplement (PMC3953066; doi:10.1371/journal.pgen.1004221), 2014-03-13
Supplement: pgen.1004221.s007.pdf [file pgen.1004221.s007.pdf]

**Protocol S2** Germination assay

Freshly harvested mature seeds were sown in triplicate in Petri dishes containing filter paper saturated with an aqueous solution of PEG 8000 at 10 to 20% (w/v) or a water control. Seeds were stratified at 4°C for 3 days before transfer to a growth chamber (50  $\mu\text{mol m}^{-2} \text{sec}^{-1}$ , 16 h photoperiod, 25°C, 70% relative humidity). Germination was scored after four days based on the development of green cotyledons.
