# Supplementary material for: Local Evolution of Seed Flotation in Arabidopsis
Source: PubMed Central journal article supplement (PMC3953066; doi:10.1371/journal.pgen.1004221), 2014-03-13
Supplement: pgen.1004221.s009.pdf [file pgen.1004221.s009.pdf]

**Protocol S4** Measurement of dry seed size and weight

Seed size was measured from images of seeds using Image J 1.43r (Freeware, National Institutes of Health, USA, <http://rsb.info.nih.gov/ij/>). Batches of 50 seeds were prepared with the Elmor C3 counting machine (Elmor, <http://www.elmor.com/>) then weighed on a Sartorius M2P microbalance (Sartorius, <http://www.sartorius.com/>).
