# Supplementary material for: Local Evolution of Seed Flotation in Arabidopsis
Source: PubMed Central journal article supplement (PMC3953066; doi:10.1371/journal.pgen.1004221), 2014-03-13
Supplement: pgen.1004221.s010.pdf [file pgen.1004221.s010.pdf]

**Table S1** Individuals characterized in detail from central Asian and Scandinavian populations affected in mucilage release

| Accession | Stock number/<br>donor | Country of<br>origin | Site of origin                                                                    | Latitude (N) | Longitude (E) |
|-----------|------------------------|----------------------|-----------------------------------------------------------------------------------|--------------|---------------|
| Ale-8     | 618AV/Ågren            | Sweden               | Sandy soil in clearing of open pine forest                                        | 56.42        | 16.31         |
| Dja-1     | 534AV/Loudet           | Kyrgyzstan           | Rocky slope                                                                       | 42.589767    | 73.629717     |
| Had-3-1   | 625AV/Rognli           | Norway               | South abrupt rocks in small dry patches of cultivated landscape and sheep pasture | 68.507617    | 14.89235      |
| Lom-3-1   | 624AV/Rognli           | Norway               | Sheepwalk in cultivated landscape, dry ground                                     | 61.681333    | 8.231000      |
| Neo-3     | 539AV/Loudet           | Tadjikistan          | Flat rocky meadow                                                                 | 37.357333    | 72.467867     |
| Neo-6     | 540AV/Loudet           | Tadjikistan          | Flat rocky meadow                                                                 | 37.357333    | 72.467867     |
| Nfro-1-1  | 622AV/Rognli           | Norway               | SW slope of mountain pasture landscape                                            | 61.57745     | 9.661783      |
| Sk-1-1    | 623AV/Rognli           | Norway               | By old cart road on SW soil cliff in old cultivated landscape                     | 61.898967    | 8.253983      |
| Sku-20    | 621AV/Ågren            | Sweden               | Rocky ledge of steep SE facing mountain slope                                     | 63.05        | 18.22         |
| Sus-1     | 533AV/Loudet           | Kyrgyzstan           | River bank                                                                        | 42.188033    | 73.406933     |

Coordinates are given in decimal degree format. AV numbers correspond to Versailles Arabidopsis stock centre.
