# Supplementary material for: Local Evolution of Seed Flotation in Arabidopsis
Source: PubMed Central journal article supplement (PMC3953066; doi:10.1371/journal.pgen.1004221), 2014-03-13
Supplement: pgen.1004221.s011.pdf [file pgen.1004221.s011.pdf]

**Table S2** Polymorphisms present in the *MUM2* gene between accessions affected in mucilage release

| Position (in bp from Col ATG) | 102    | 165    | 406/407  | 409      | 549/550  | 616      | 674      | 693      | 718      | 729-733  | 740      | 758      | 943      |
|-------------------------------|--------|--------|----------|----------|----------|----------|----------|----------|----------|----------|----------|----------|----------|
|                               | Exon 1 | Exon 1 | Intron 1 | Intron 1 | Intron 1 | Intron 1 | Intron 1 | Intron 1 | Intron 1 | Intron 1 | Intron 1 | Intron 1 | Intron 1 |
| Col-0                         | C      | T      | CG       | a        | ct       | t        | a        | g        | g        | g        | g        | g        | a        |
| Bay-0                         | T      | T      | CG       | t        | ct       | t        | a        | g        | t        | g        | g        | a        | a        |
| Shahdara / Neo-3              | C      | T      | CG       | a        | --       | t        | a        | g        | t        | --tt     | g        | g        | a        |
| Neo-6                         | C      | T      | CG       | a        | --       | t        | a        | g        | t        | --tt     | g        | g        | a        |
| Dja-1                         | C      | T      | CG       | a        | --       | t        | a        | g        | t        | --tt     | g        | g        | a        |
| Sus-1                         | C      | T      | CG       | a        | ct       | t        | a        | g        | t        | tttt     | g        | g        | a        |
| Nfro-1-1                      | C      | T      | CG       | a        | ct       | t        | a        | g        | t        | tttt     | g        | g        | a        |
| Ale-8                         | C      | C      | TT       | a        | ct       | t        | a        | a        | t        | ----     | g        | g        | g        |
| Sku-20                        | C      | C      | TT       | a        | ct       | t        | a        | a        | t        | ----     | g        | g        | g        |
| Had-3-1                       | C      | T      | CG       | a        | ct       | t        | a        | a        | t        | --tt     | g        | g        | g        |
| Lom-3-1                       | C      | T      | CG       | a        | ct       | t        | -        | g        | t        | --tt     | g        | g        | a        |
| Sk-1-1                        | C      | T      | CG       | a        | ct       | c        | a        | g        | t        | --tt     | g        | g        | a        |

  

| 945      | 962      | 1053     | 1066     | 1089     | 1203     | 1208     | 1256     | 1264     | 1307     | 1408     | 1575     | 1765     | 1846     | 1942/1943 |
|----------|----------|----------|----------|----------|----------|----------|----------|----------|----------|----------|----------|----------|----------|-----------|
| Intron 1 | Intron 1 | Intron 1 | Intron 1 | Intron 1 | Intron 1 | Intron 1 | Intron 1 | Intron 1 | Intron 1 | Intron 1 | Intron 1 | Intron 1 | Intron 1 | Intron 1  |
| a        | c        | a        | t        | a        | g        | g        | c        | c        | a        | a        | c        | g        | g        | tc        |
| a        | c        | a        | t        | g        | g        | g        | c        | c        | g        | a        | c        | g        | g        | ct        |
| a        | c        | a        | t        | g        | g        | g        | c        | c        | g        | t        | c        | g        | g        | ct        |
| a        | c        | a        | t        | g        | g        | g        | c        | c        | g        | t        | c        | g        | g        | ct        |
| a        | c        | a        | t        | g        | g        | g        | c        | c        | g        | a        | c        | g        | g        | ct        |
| g        | t        | g        | t        | a        | g        | g        | c        | t        | g        | a        | t        | g        | a        | ct        |
| g        | t        | g        | c        | a        | g        | g        | c        | g        | g        | a        | t        | g        | g        | ct        |
| g        | c        | a        | c        | a        | g        | g        | a        | t        | g        | a        | t        | g        | a        | ct        |
| a        | c        | a        | t        | g        | g        | g        | c        | c        | a        | a        | c        | g        | g        | tc        |
| a        | c        | a        | t        | g        | g        | g        | c        | c        | g        | a        | c        | g        | g        | tc        |

  

| 1985[]   | 1996[]   | 2010     | 2189     | 2198     | 2323   | 2406     | 2461     | 2540   | 2580   | 2695[]      | 2700     | 2817   | 3122     | 3134     |
|----------|----------|----------|----------|----------|--------|----------|----------|--------|--------|-------------|----------|--------|----------|----------|
| Intron 1 | Intron 1 | Intron 1 | Intron 2 | Intron 2 | Exon 3 | Intron 3 | Intron 3 | Exon 4 | Exon 4 | Intron 4    | Intron 4 | Exon 5 | Intron 6 | Intron 6 |
| ----     | ----     | c        | c        | t        | C      | t        | c        | G      | G      | -----       | t        | G      | t        | a        |
| gatat    | ccaa     | c        | a        | t        | C      | t        | c        | G      | G      | -----       | t        | G      | t        | a        |
| gatat    | ccaa     | c        | a        | t        | C      | t        | c        | G      | G      | cggaacccaaa | t        | G      | a        | g        |
| gatat    | ccaa     | c        | a        | T        | C      | t        | c        | G      | G      | cggaacccaaa | t        | G      | a        | g        |
| gatat    | ccaa     | g        | a        | t        | C      | t        | c        | C      | A      | cggaacccaaa | c        | A      | a        | g        |
| ----     | ----     | c        | c        | t        | C      | t        | c        | G      | G      | -----       | t        | G      | a        | a        |
| ----     | ----     | c        | a        | a        | C      | t        | c        | G      | G      | -----       | t        | G      | a        | a        |
| ----     | ----     | c        | a        | a        | C      | t        | c        | G      | G      | -----       | t        | G      | a        | a        |
| ----     | ----     | c        | a        | a        | C      | t        | c        | G      | G      | -----       | t        | G      | a        | a        |
| ----     | ----     | c        | c        | t        | C      | t        | t        | G      | G      | -----       | t        | G      | a        | a        |
| ----     | ----     | c        | c        | t        | C      | t        | t        | G      | G      | -----       | t        | G      | a        | a        |

  

=> STOP
M => I
E => K
=> STOP

| 3165   | 3201   | 3425   | 4253      | 4393      | 4421    | 4840    | 4845    | 4906[]  | 4966      | 5029    | 5102-5145 | 5110    |
|--------|--------|--------|-----------|-----------|---------|---------|---------|---------|-----------|---------|-----------|---------|
| Exon 7 | Exon 7 | Exon 8 | Intron 11 | Intron 11 | Exon 12 | Exon 14 | Exon 14 | Exon 14 | Intron 14 | Exon 15 | Exon 15   | Exon 15 |
| C      | T      | G      | a         | a         | G       | T       | T       | ---     | g         | C       | TCACCCCT  | G       |
| C      | T      | G      | a         | a         | G       | T       | T       | ---     | g         | C       | TCACCCCT  | G       |
| C      | T      | G      | g         | g         | G       | T       | T       | ---     | g         | C       | TCACCCCT  | G       |
| C      | T      | G      | g         | g         | G       | T       | T       | ---     | g         | C       | TCACCCCT  | G       |
| C      | T      | G      | a         | a         | G       | G       | G       | ---     | a         | A       | TCACCCCT  | T       |
| C      | T      | G      | a         | a         | G       | T       | T       | ---     | g         | C       | TCACCCCT  | G       |
| C      | T      | T      | a         | a         | G       | T       | T       | ---     | g         | A       | TCACCCCT  | G       |
| C      | T      | T      | a         | a         | G       | T       | T       | ---     | g         | A       | TCACCCCT  | G       |
| C      | T      | T      | a         | a         | G       | T       | T       | ---     | g         | A       | TCACCCCT  | G       |
| C      | T      | G      | a         | a         | G       | T       | T       | TACA    | g         | C       | TCACCCCT  | G       |
| C      | T      | G      | g         | a         | G       | T       | T       | ---     | g         | C       | TCACCCCT  | G       |
| C      | T      | G      | g         | a         | G       | T       | T       | ---     | g         | C       | TCACCCCT  | G       |

  

F => L
=> STOP
G => E
=> frameshift + STOP
=> frameshift + STOP

Each column is a polymorphic site (either single nucleotide polymorphisms or insertions/deletions) in the *MUM2* gene (At5g63800). Each line is the haplotype of the accession indicated at the top left, except for the top two lines that indicate the position (in bp) for each polymorphic site from the ATG of the gene, or exon or intron number. Alleles identical to Col-0 are shaded in black, those in exons are shown in upper case and in introns are shown in lower case. Non-synonymous polymorphisms are highlighted in red and the consequences in terms of protein sequence are indicated below columns.
