# Supplementary material for: Local Evolution of Seed Flotation in Arabidopsis
Source: PubMed Central journal article supplement (PMC3953066; doi:10.1371/journal.pgen.1004221), 2014-03-13
Supplement: pgen.1004221.s012.pdf [file pgen.1004221.s012.pdf]

**Table S3** Analysis of geographical variation in *Arabidopsis mucilage*

|                   | Within region variation |                  | Between region variation |                             |
|-------------------|-------------------------|------------------|--------------------------|-----------------------------|
|                   | Asia                    | Norway           | Asia and Norway          | Asia, France, Norway, Spain |
| Mucilage          | $F_{ST} = 1$            | $F_{ST} = 0.85$  | $F_{CT} = 0$             | $F_{CT} = 0.123$            |
| <i>MUM2</i>       | $F_{ST} = 0.84$         | $F_{ST} = 0.86$  | $F_{CT} = 0.41$          | not analyzed                |
| Neutral markers * | $F_{ST} = 0 - 1$        | $F_{ST} = 0 - 1$ | $F_{CT} = 0 - 0.90$      | $F_{CT} = 0.06-0.24$        |

SNP, single nucleotide polymorphism;  $F_{ST}$ , fixation index among populations;  $F_{CT}$ , fixation index among regions. For neutral markers, the 95 percentiles of the distribution observed for 137 SNP markers and 20 microsatellite markers is given. Values observed for mucilage and *MUM2* fall within the 95 percentile of the neutral markers.
