# Supplementary material for: Local Evolution of Seed Flotation in Arabidopsis
Source: PubMed Central journal article supplement (PMC3953066; doi:10.1371/journal.pgen.1004221), 2014-03-13
Supplement: pgen.1004221.s013.pdf [file pgen.1004221.s013.pdf]

**Table S4.** Central Asian and Scandinavian accessions analyzed for seed flotation

| Accession      | Versailles identification number (AV) | Country of origin | Latitude (N) | Longitude (E) |
|----------------|---------------------------------------|-------------------|--------------|---------------|
| 9481B          | 261                                   | Kazakhstan        | -            | -             |
| Al-0           | 456                                   | Denmark           | -            | -             |
| Bas-1          | 347                                   | Russia            | 51.8333      | 79.4666       |
| Ber            | 299                                   | Denmark           | -            | -             |
| Bij            | 355                                   | Russia            | 52.5166      | 85.2666       |
| Chab-1         | 351                                   | Russia            | 53.6         | 79.3833       |
| Chi-0          | 89                                    | Russia            | -            | -             |
| Fl-1           | 199                                   | Finland           | -            | -             |
| Fl-3           | 472                                   | Finland           | -            | -             |
| Hau-0          | 273                                   | Denmark           | -            | -             |
| Hodja-Obi-Garm | 203                                   | Tadjikistan       | -            | -             |
| K-oz-1         | 333                                   | Russia            | 51.3333      | 82.1833       |
| K-oz-3         | 335                                   | Russia            | 51.3333      | 82.1833       |
| Kly-2          | 328                                   | Russia            | 51.3         | 82.5833       |
| Kly-4          | 330                                   | Russia            | 51.3166      | 82.5666       |
| Kly-5          | 331                                   | Russia            | 51.3333      | 82.55         |
| Kondara        | 190                                   | Tadjikistan       | -            | -             |
| Kz-1           | 402                                   | Kazakhstan        | 49.5         | 73.1          |
| Kz-9           | 403                                   | Kazakhstan        | 49.5         | 73.1          |
| * Leb-1        | 336                                   | Russia            | 51.6333      | 80.7833       |
| Leb-4          | 339                                   | Russia            | 51.6333      | 80.8          |
| Lu-1           | 54                                    | Sweden            | -            | -             |
| Mas            | 354                                   | Russia            | 54.1166      | 81.3          |
| N3             | 291                                   | Russia            | -            | -             |
| N6             | 262                                   | Russia            | -            | -             |
| N7             | 263                                   | Russia            | -            | -             |
| N8             | 264                                   | Russia            | -            | -             |
| N9             | 284                                   | Russia            | -            | -             |
| N10            | 265                                   | Russia            | -            | -             |
| N11            | 285                                   | Russia            | -            | -             |
| N13            | 266                                   | Russia            | -            | -             |
| N15            | 268                                   | Russia            | -            | -             |
| N16            | 287                                   | Russia            | -            | -             |
| N17            | 269                                   | Russia            | -            | -             |
| Nos            | 343                                   | Russia            | 51.8666      | 80.5833       |
| Nov-3          | 342                                   | Russia            | 51.7333      | 80.85         |
| Oy-0           | 224                                   | Norway            | -            | -             |
| Pan            | 353                                   | Russia            | 53.8166      | 80.3          |
| Per-1          | 100                                   | Russia            | -            | -             |
| * Rak-1        | 344                                   | Russia            | 51.85        | 80.05         |
| * Rak-3        | 346                                   | Russia            | 51.8666      | 80.05         |
| Rld-2          | 229                                   | Russia            | -            | -             |
| Rsch-4         | 90                                    | Russia            | -            | -             |
| Rubezhnoe-1    | 231                                   | Ukraine           | -            | -             |
| * Sev          | 350                                   | Russia            | 52.1         | 79.3          |
| Sij-1          | 356                                   | Uzbekistan        | 41.75        | 70.0833       |
| Sij-4          | 359                                   | Uzbekistan        | 41.75        | 70.0833       |
| St-0           | 62                                    | Sweden            | -            | -             |
| Stw-0          | 92                                    | Russia            | -            | -             |
| Sv-0           | 513                                   | Denmark           | -            | -             |
| Te-0           | 68                                    | Finland           | -            | -             |
| UII2-3         | 383                                   | Sweden            | 56.09        | 13.46         |
| Wil-3          | 525                                   | Russia            | -            | -             |

Co-ordinates are given in decimal degree format. -, precise location data unavailable.

\*, indicates floating mucilage releasing (FMR) accessions.
